# Supplementary material
Source: PubMed Central journal article supplement (PMC3129571)

TA

quadriceps gastrocnemius

biceps

diaphragm

heart

abdominal

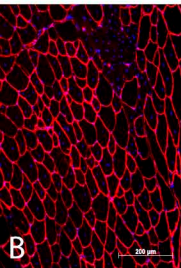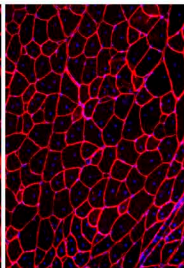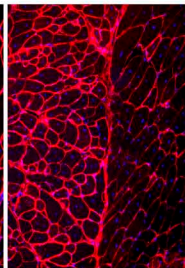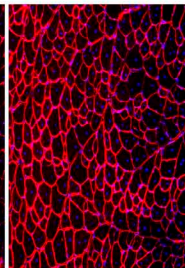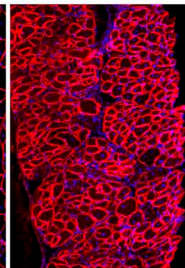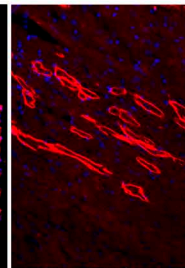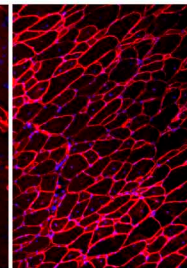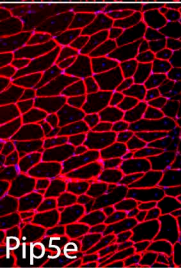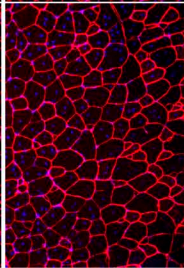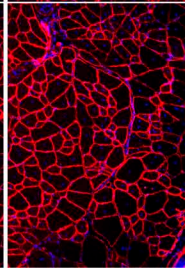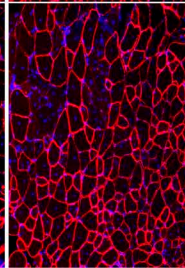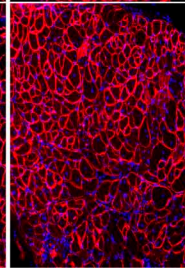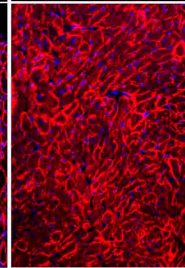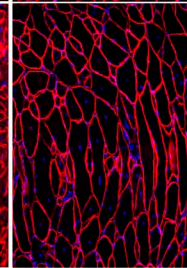

marker  
-ve  
c57  
mdx  
TA  
quadriceps  
gastrocnemius  
biceps  
diaphragm  
heart  
abdominal

B

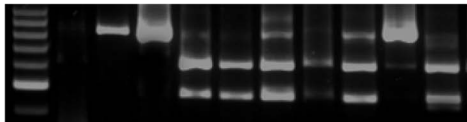

full-length

Δexon23

Δexon22&23

Pip5e

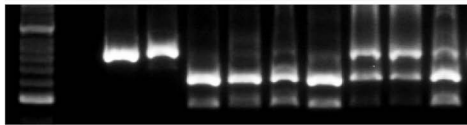

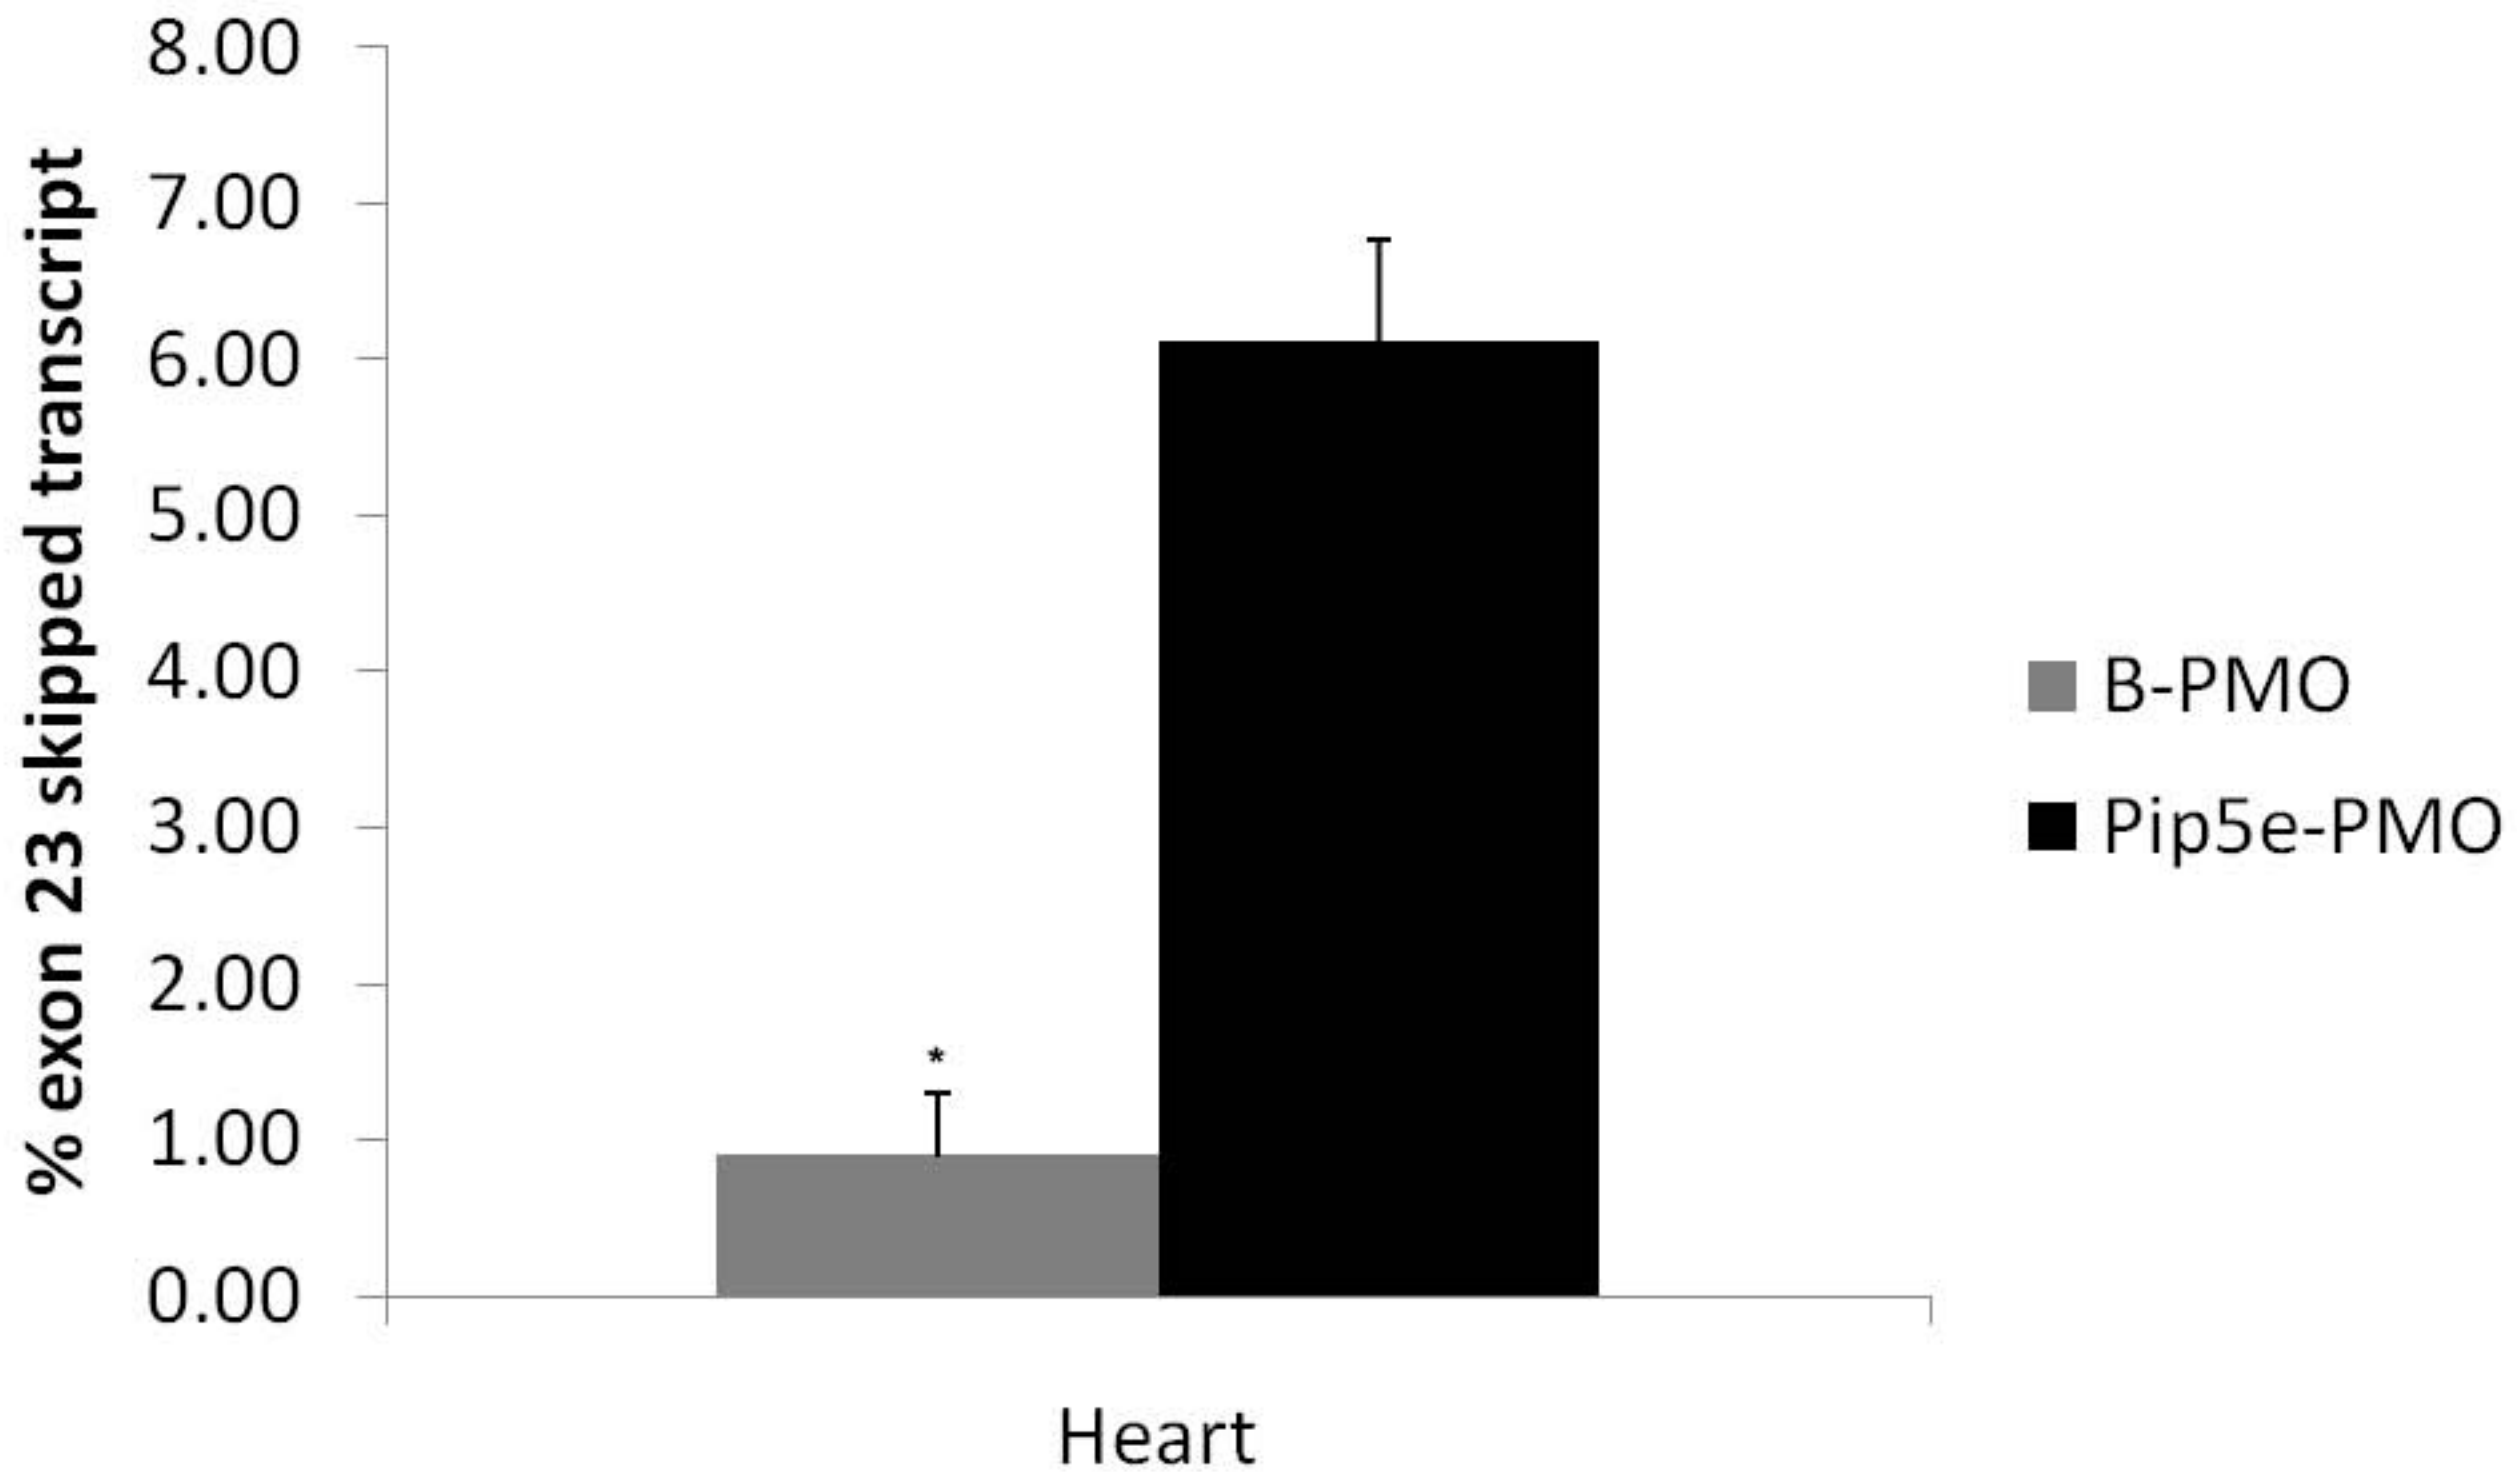

10% c57

mdx

TA

quadriceps

gastrocnemius  
biceps

diaphragm

heart

abdominal

dystrophin

B

$\alpha$ -actinin

dystrophin

Pip5e

$\alpha$ -actinin

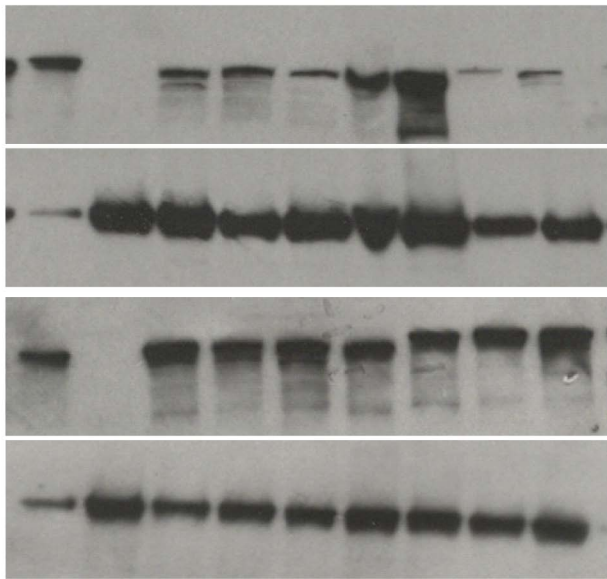

TA quadriceps gastrocnemius biceps diaphragm heart abdominal

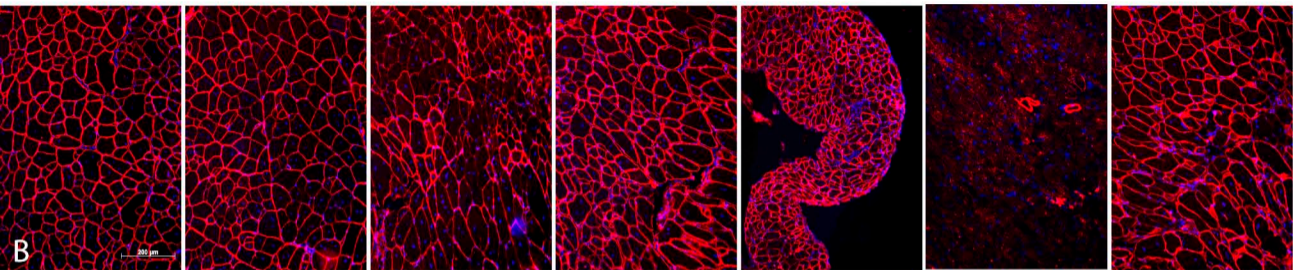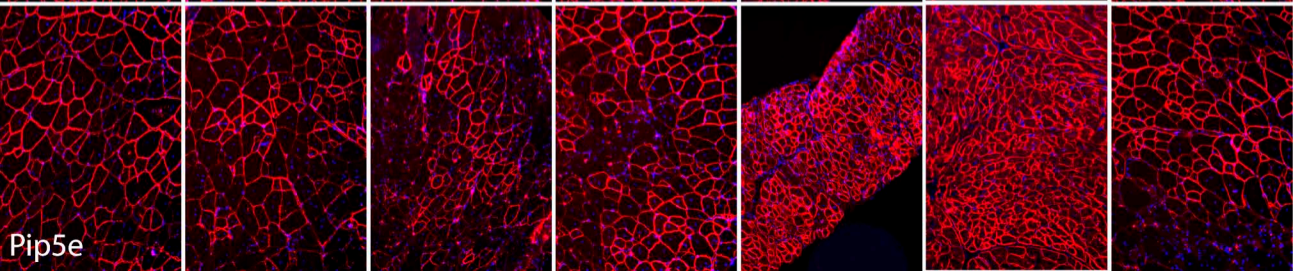

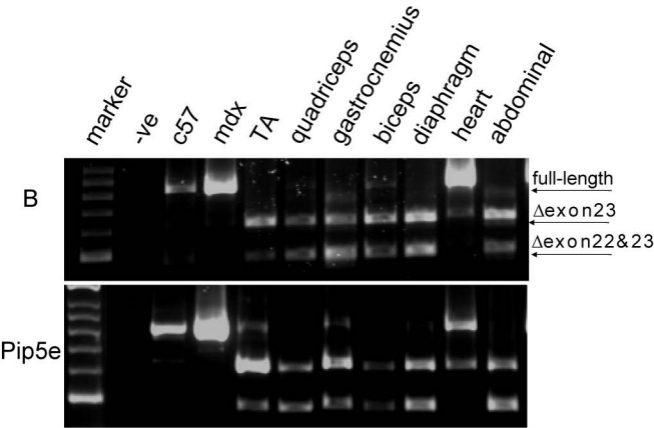

10% c57  
mdx  
TA  
quadriceps  
gastrocnemius  
biceps  
diaphragm  
heart  
abdominal

B

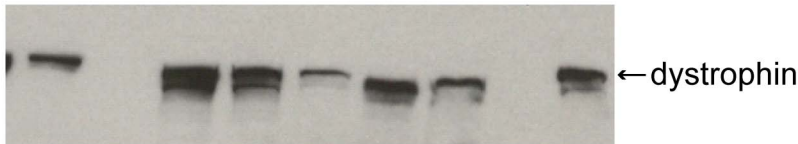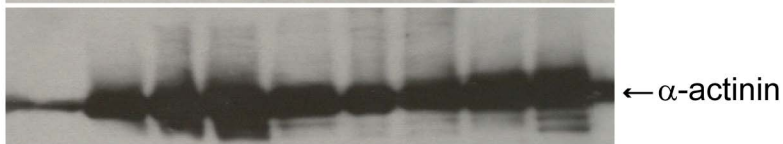

Pip5e

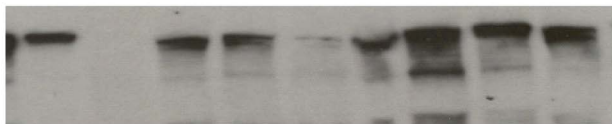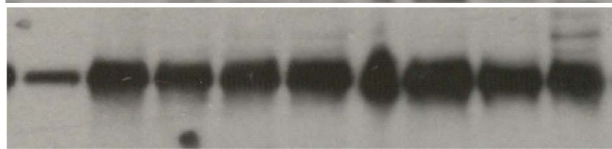

Supplement: mt201179x3.pdf [file mt201179x3.pdf]
