# Supplementary material
Source: PubMed Central journal article supplement (PMC3129571)

TA quadriceps gastrocnemius biceps diaphragm heart abdominal

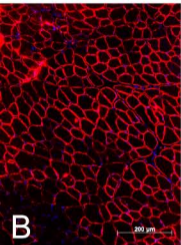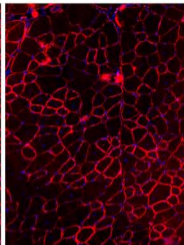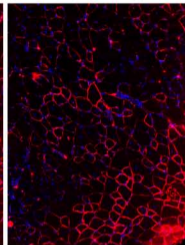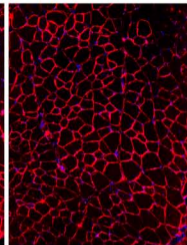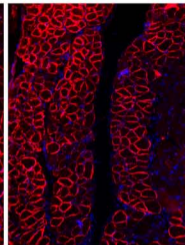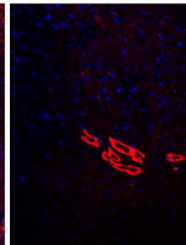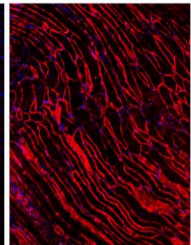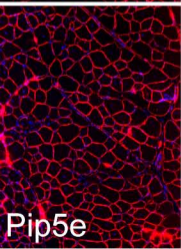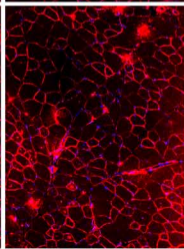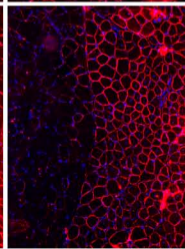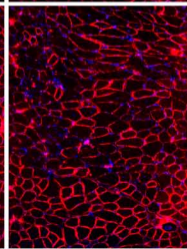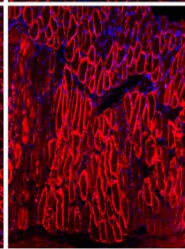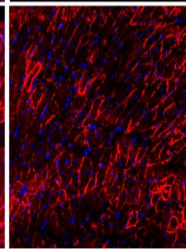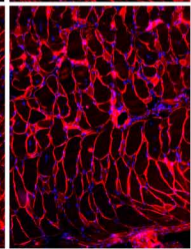

marker  
negative  
c57  
mdx  
TA  
quadriciceps  
gastronemius  
biceps  
diaphragm  
heart  
abdominal

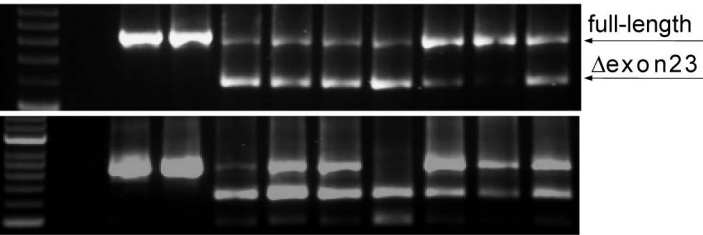

25% c57  
mdx  
TA  
quadriceps  
gastrocnemius  
biceps  
diaphragm  
heart  
abdominal

Pip5e

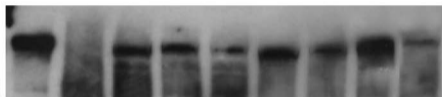

← dystrophin

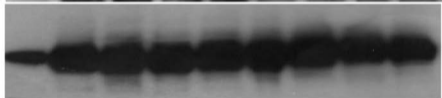

←  $\alpha$ -actinin

B

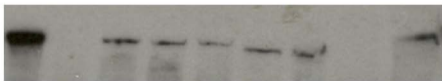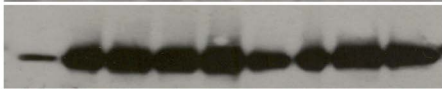

Supplement: mt201179x4.pdf [file mt201179x4.pdf]
