# Supplementary material
Source: PubMed Central journal article supplement (PMC3129571)

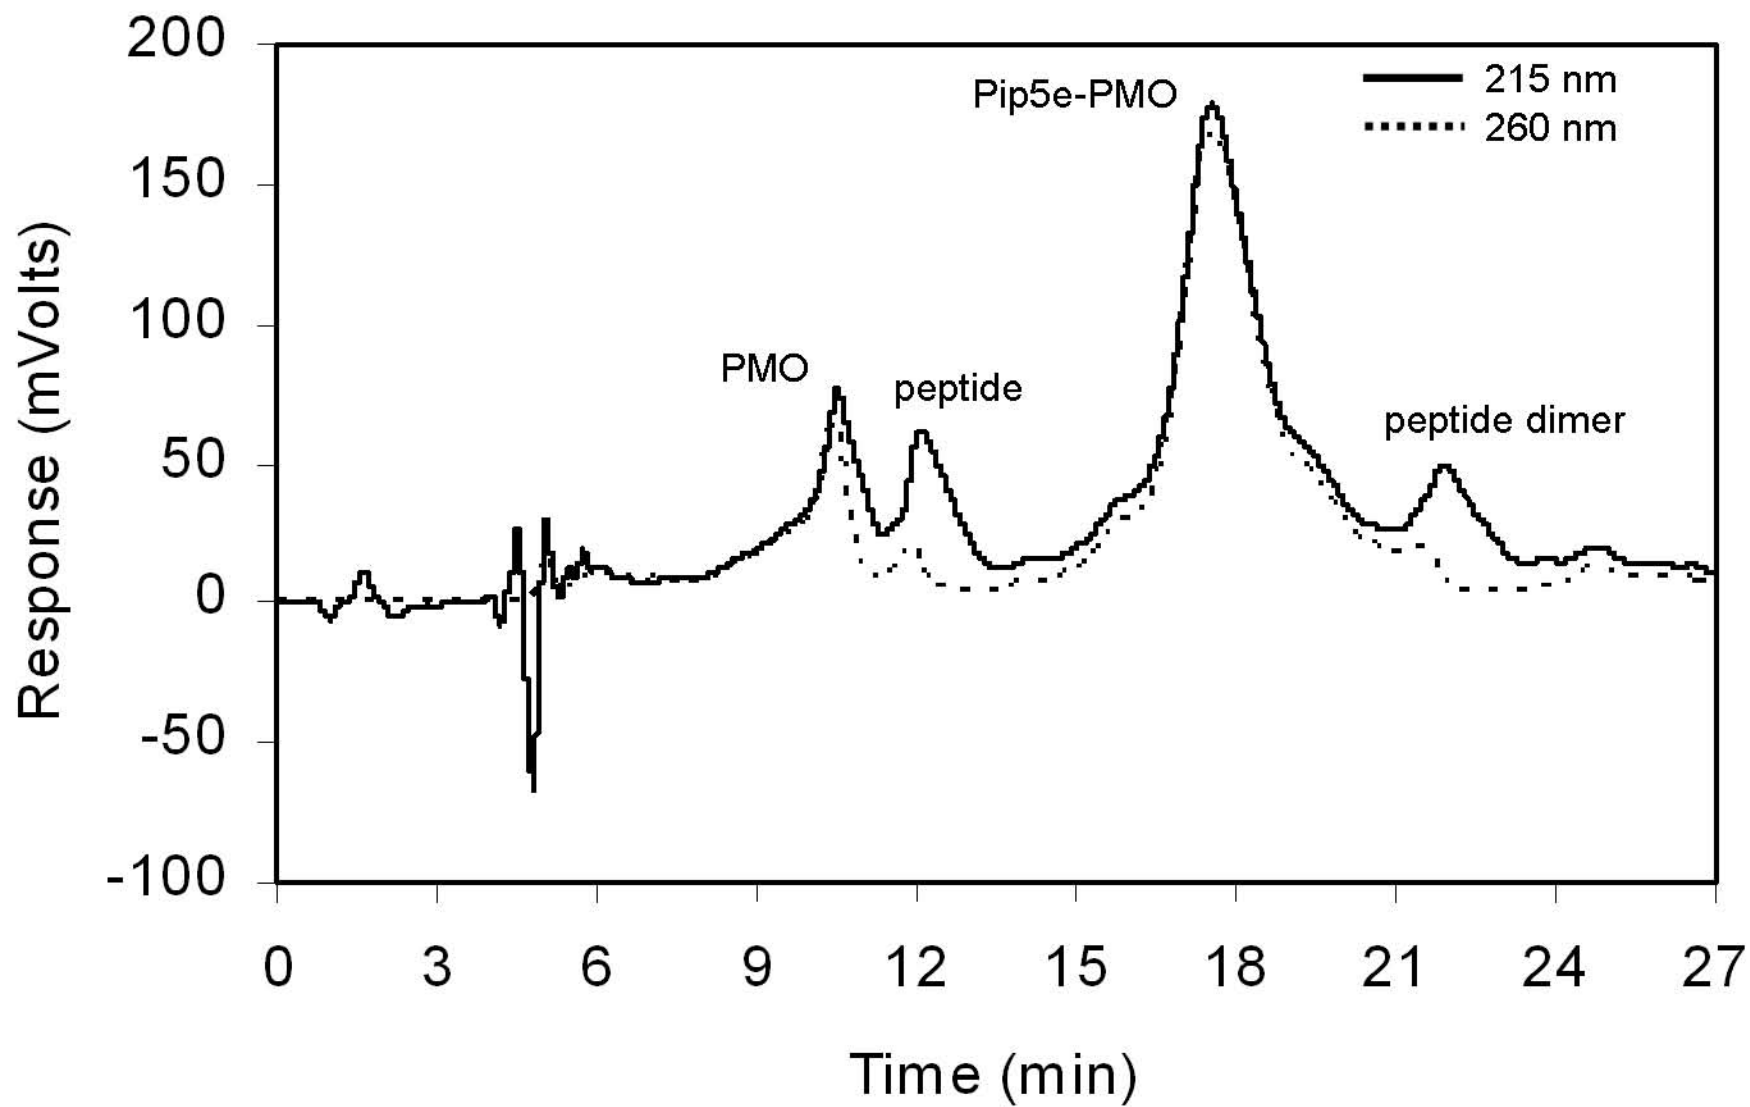

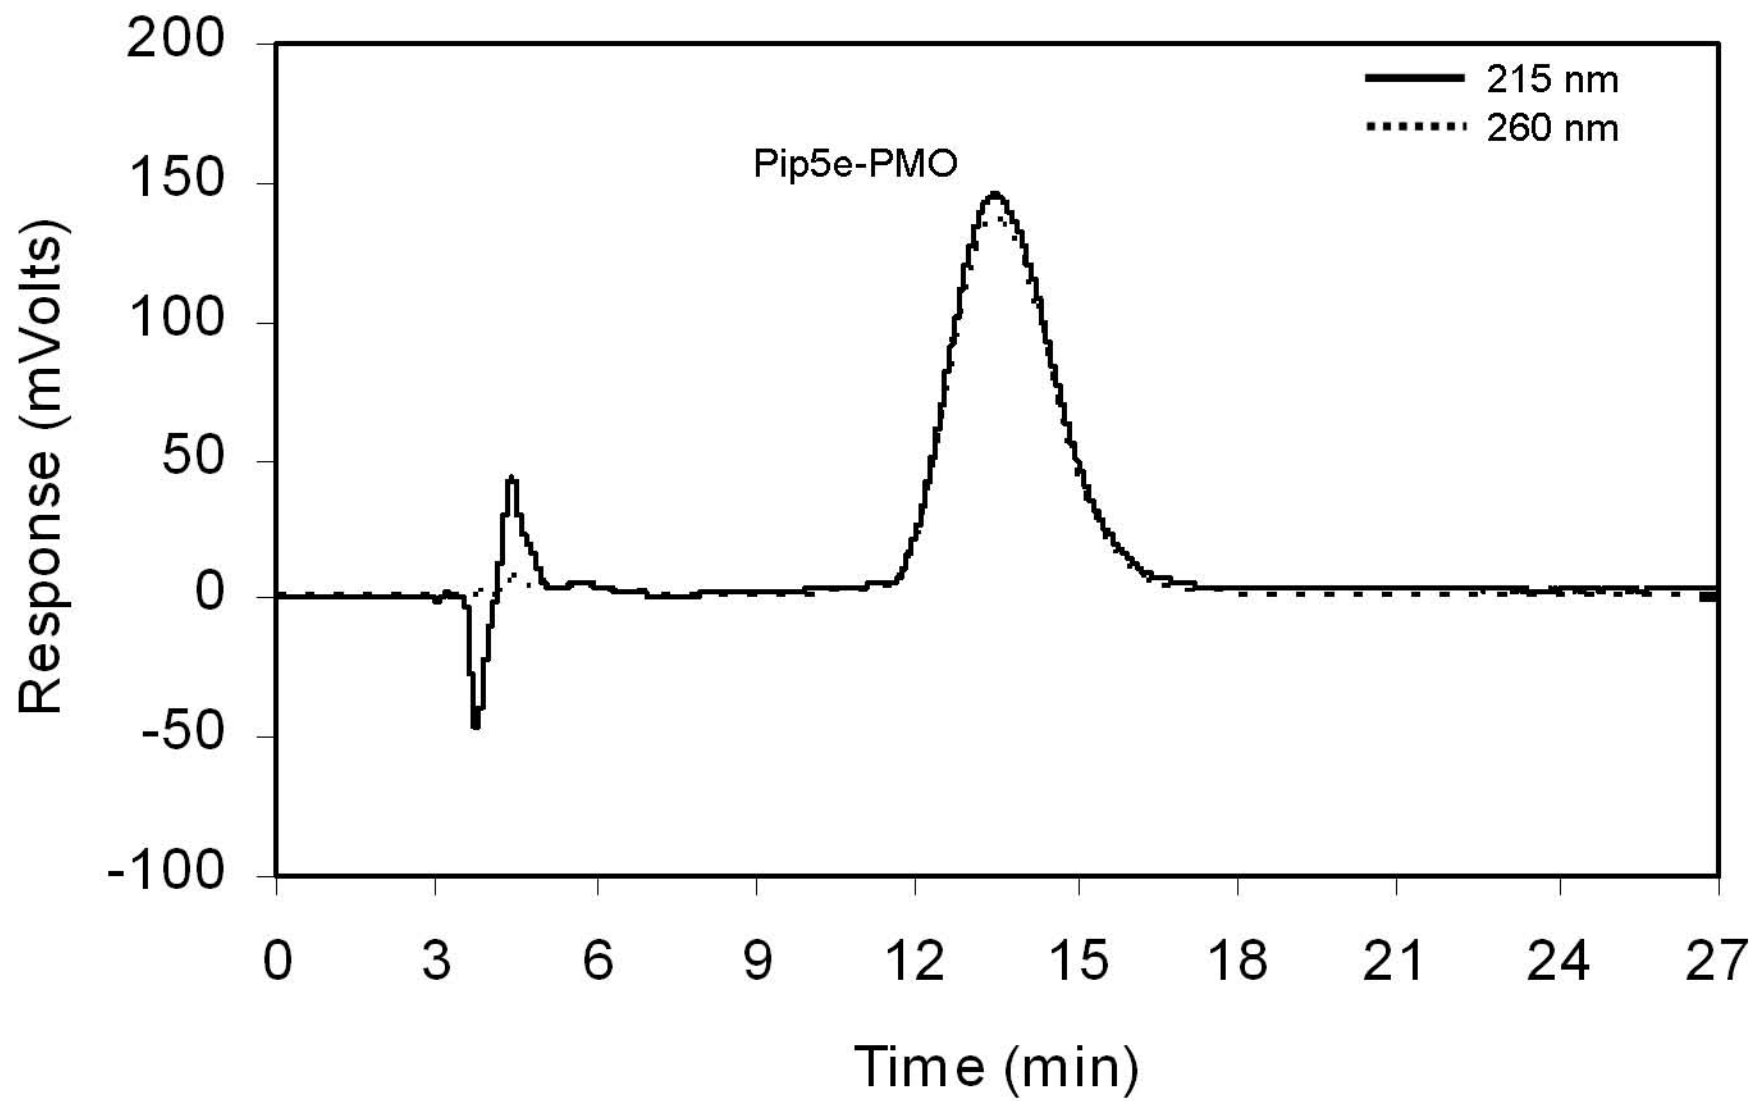

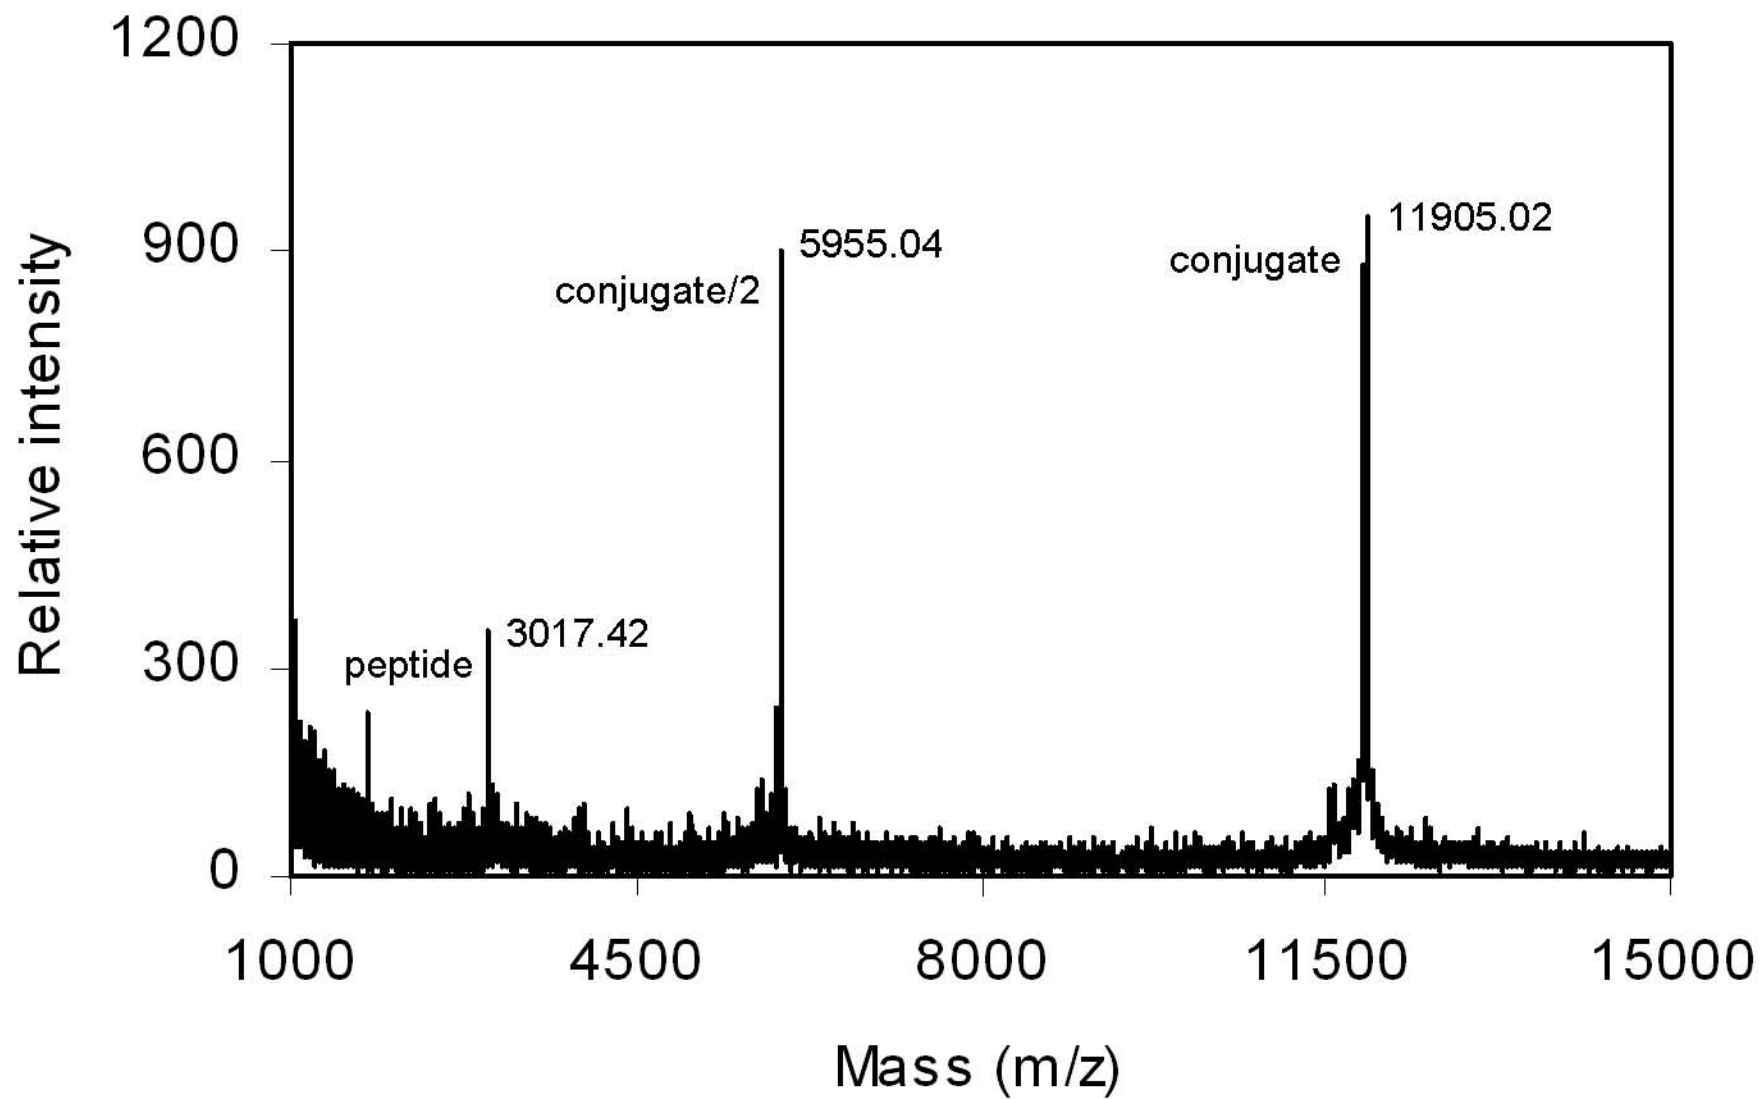

Supplement: mt201179x1.pdf [file mt201179x1.pdf]

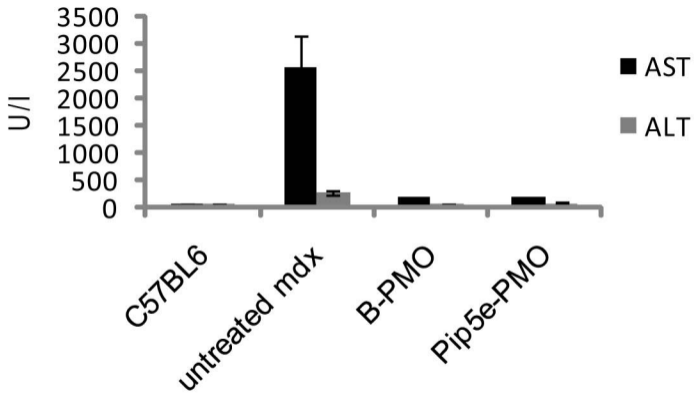

c57

mdx

B-PMO

Pip5e-PMO

kidney

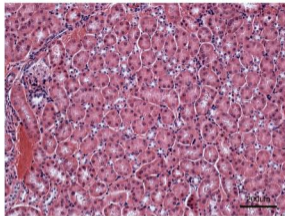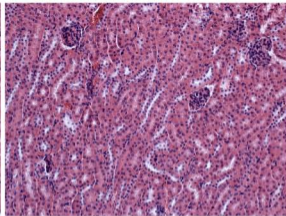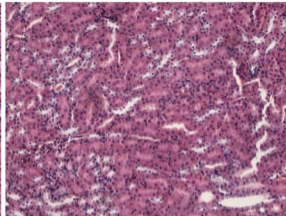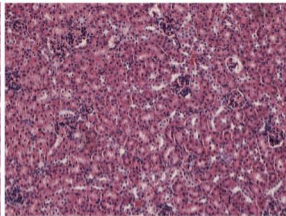

liver

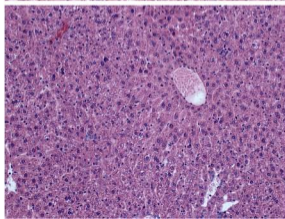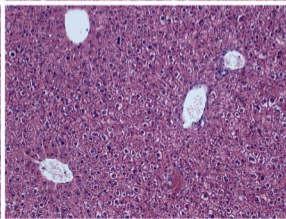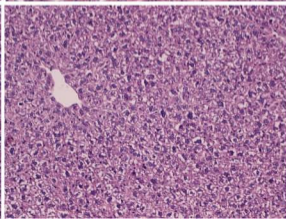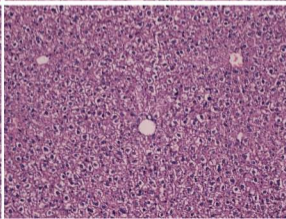

c57

mdx

B-PMO

Pip5e-PMO

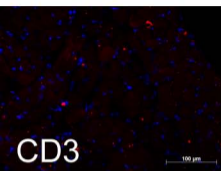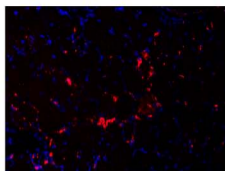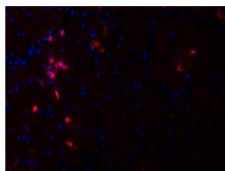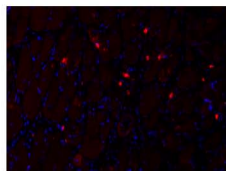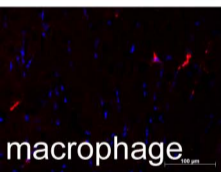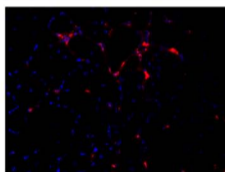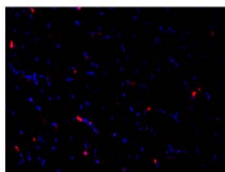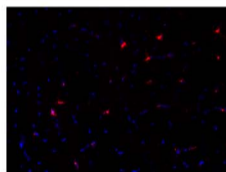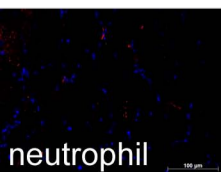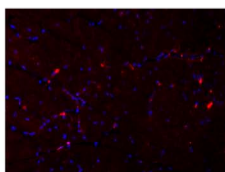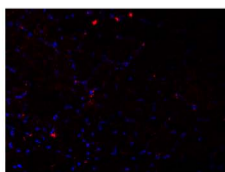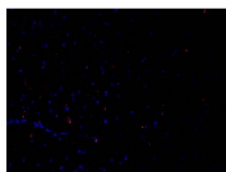

Supplement: mt201179x2.pdf [file mt201179x2.pdf]
